1 **Deciphering human ribonucleoprotein regulatory networks**

2 Neelanjan Mukherjee<sup>1</sup>, Hans-Hermann Wessels<sup>2</sup>, Svetlana Lebedeva<sup>2</sup>, Marcin Sajek<sup>3</sup>, Thalia

3 Farazi<sup>3</sup>, Mahsa Ghanbari<sup>2</sup>, Aitor Garzia<sup>3</sup>, Alina Munteanu<sup>2</sup>, Jessica Spitzer<sup>3</sup>, Kemal Akat<sup>3</sup>,

4 Thomas Tuschl<sup>3</sup>, Uwe Ohler<sup>2</sup>

5

6 <sup>1</sup>Department of Biochemistry and Molecular Genetics, University of Colorado School of

7 Medicine, Aurora, Colorado 80045, USA.

8 <sup>2</sup>Berlin Institute for Medical Systems Biology, Max Delbrück Center for Molecular Medicine,

9 Berlin, Germany.

10 <sup>3</sup>Howard Hughes Medical Institute and Laboratory for RNA Molecular Biology, The Rockefeller

11 University, 1230 York Ave, Box 186, New York, NY 10065

12

13 Correspondence to: [ttuschl@rockefeller.edu](mailto:ttuschl@rockefeller.edu), [uwe.ohler@mdc-berlin.de](mailto:uwe.ohler@mdc-berlin.de),

14 [neelanjan.mukherjee@ucdenver.edu](mailto:neelanjan.mukherjee@ucdenver.edu)

15

16

17

18

19

20

21 RNA-binding proteins (RBPs) control and coordinate each stage in the life cycle of RNAs.  
22 Although *in vivo* binding sites of RBPs can now be determined genome-wide, most studies  
23 typically focused on individual RBPs. Here, we examined a large compendium of 114 high-  
24 quality transcriptome-wide *in vivo* RBP-RNA cross-linking interaction datasets generated by the  
25 same protocol in the same cell line and representing 64 distinct RBPs. Comparative analysis of  
26 categories of target RNA binding preference, sequence preference, and transcript region  
27 specificity was performed, and identified potential posttranscriptional regulatory modules, i.e.  
28 specific combinations of RBPs that bind to specific sets of RNAs and targeted regions. These  
29 regulatory modules encoded functionally related proteins and exhibited distinct differences in  
30 RNA metabolism, expression variance, as well as subcellular localization. This integrative  
31 investigation of experimental RBP-RNA interaction evidence and RBP regulatory function in a  
32 human cell line will be a valuable resource for understanding the complexity of post-  
33 transcriptional regulation.

34

## 35 **Introduction**

36 Of the 20,345 annotated protein-coding genes in human, at least 1,542 are RNA-binding proteins  
37 (RBPs) (Gerstberger et al., 2014). RBPs interact with RNA regulatory elements within RNA  
38 targets to control splicing, nuclear export, localization, stability, and translation (Moore, 2005).  
39 RBPs have specificity to bind one or multiple RNA categories, including messenger RNA  
40 (mRNA) and diverse categories of non-coding RNA such as ribosomal RNA (rRNA), transfer  
41 RNA (tRNA), small nuclear and nucleolar RNA (snRNA/snoRNA), microRNA (miRNA), and  
42 long non-coding RNA (lncRNA). Mutations in RBPs or RNA regulatory elements can result in  
43 defects in RNA metabolism that cause human disease (Cooper et al., 2009; Fredericks et al.,  
44 2015).

45  
46 A standard technique for *in vivo* global identification of RBP-RNA interaction sites consists of  
47 immunoprecipitating the ribonucleoprotein (RNP) complex, isolating the bound RNA, and  
48 quantifying the RNA targets by microarrays or deep sequencing (Tenenbaum et al., 2000; Zhao  
49 et al., 2010). The introduction of cross-linking prior to immunoprecipitation (CLIP) as well as  
50 RNase digestion enabled the biochemical mapping of individual interaction sites (Ule et al.,  
51 2003). Subsequent modifications to CLIP increased the resolution of the interaction sites (Hafner  
52 et al., 2010; König et al., 2010). One of these methods, photoactivatable ribonucleoside-  
53 enhanced cross-linking and immunoprecipitation (PAR-CLIP), utilizes 4-thiouridine or 6-  
54 thioguanosine combined with 365 nm UV crosslinking to produce single-nucleotide RBP-RNA  
55 interaction evidence that is utilized to define binding sites (Corcoran et al., 2011; Garzia et al.,  
56 2017; Hafner et al., 2010).

57 Experimentally-derived RBP binding sites provide valuable functional insights. First, they can  
58 reveal the rules for regulatory site recognition by the RBP, whether due to sequence and/or  
59 structural characteristics. Second, the region and position of the interaction sites of an RBP  
60 within transcripts provides insights into its role in RNA metabolism and its subcellular  
61 localization. For example, if most of the mapped interaction sites are intronic and adjacent to  
62 splice sites, the RBP is highly likely to be a nuclear splicing factor rather than a cytoplasmic  
63 translation factor. Finally, these data reveal the target transcripts and therefore the potential  
64 biological role for the RBP.

65  
66 Throughout the life of an RNA, interactions with many different RBPs determine the ultimate  
67 fate of the transcript. Even though profiling of the interaction sites of a single RBP is clearly  
68 powerful, it does not provide information on other RBPs potentially targeting the same RNA or  
69 on other regulatory elements within the RNA. Small comparative efforts focusing on the  
70 regulation of splicing, 3' end processing, RNA stability by AU-rich elements, and miRNA-  
71 mediated silencing have demonstrated the value of integrating interaction sites from multiple  
72 RBPs (Martin et al., 2012; Mukherjee et al., 2014; Pandit et al., 2013; Zhang et al., 2010).

73 Therefore, a large-scale comparative examination of interaction sites for many RBPs will yield  
74 valuable knowledge regarding the architecture and determinants of RNA regulatory networks.

75  
76 At least 173 PAR-CLIP experiments have been performed in HEK293 cells to date, laying the  
77 groundwork for a large-scale integrative analysis and complementing efforts of ENCODE, which  
78 focused on other cell types and utilized other CLIP protocols (Van Nostrand et al., 2016). We  
79 describe a concerted effort to identify and uniformly process all high-quality PAR-CLIP data sets

80 by evaluating the characteristic T-to-C transitions induced by photocrosslinking. Using the  
81 resulting compendium of high-quality in vivo RBP interaction maps from the same cell line  
82 enabled us to determine the relationship between RBPs with respect to their preferred category of  
83 target RNA and any underlying sequence specificity. We uncovered regulatory modules reflected  
84 by combinatorial binding events, and assessed their role and functional implications on RNA  
85 metabolism. Finally, our results support the role of RBPs in buffering gene expression variance.

86

## 87 **Results**

### 88 **A high-quality map of in vivo RBP-RNA interactions across 64 proteins**

89 In order to generate a comprehensive quantitative resource of RBP-RNA interactions within a  
90 human cell line, we identified 166 published PAR-CLIP data sets performed predominantly in  
91 HEK293 cells, and added 7 new libraries generated in our laboratories (Sup Table 1). Typically,  
92 these datasets were generated using transgenic HEK293 cell lines in which each individual RBP  
93 was FLAG-tagged and recombined into the same chromosomal locus containing a strong  
94 promoter. In this way, the expression of each RBP as well as the strength of its  
95 immunoprecipitation were generally comparable. Furthermore, the availability of orthogonal  
96 transcriptome-wide datasets quantifying individual steps of RNA metabolism made HEK293  
97 cells ideal for examining the functional characteristics of RNA targets (Mukherjee et al., 2017).

98

99 Each of the 173 PAR-CLIP libraries generated in HEK293 were subject to a stringent analysis  
100 strategy to retain high-quality datasets (Supplemental Table 1). First, each library was analyzed  
101 using the PAR-CLIP Suite v1.0 ([https://rnaworld.rockefeller.edu/PARCLIP\\_suite](https://rnaworld.rockefeller.edu/PARCLIP_suite)) (Garzia et al.,

102 2017) to discriminate significant target RNA categories from non-crosslinked background RNA  
103 categories populated by fragments of abundant cellular RNAs (see Methods, Supplemental Fig.  
104 1A). Next, we defined binding sites based on the local density of T-to-C transitions using  
105 PARpipe (<https://github.com/ohlerlab/PARpipe>) (Corcoran et al., 2011) and only retained those  
106 libraries with sufficiently high read counts and T-to-C transition specificity compared to a deeply  
107 sequenced background reference library (Supplemental Fig 1b) (Friedersdorf and Keene, 2014).  
108 Since the immunoprecipitation step was omitted in this reference library it served as an effective  
109 comparison point to score read count and T-to-C transition for all RBPs. Finally, for RBPs with  
110 more than 3 libraries available, outlier libraries exhibiting poor correlation of 6-mer frequencies  
111 were excluded (Supplemental Fig 1d, e). This resulted in 114 libraries corresponding to 64 RBPs  
112 that were the basis for downstream analysis. There were eight RBP families represented by two  
113 or more RBPs.

114

### 115 **Grouping RBPs by annotation category and positional binding site preferences**

116 As first step to describe RBP-RNA regulatory networks, we determined the relative binding  
117 preference of each RBP for specific target RNA annotation categories (Supplemental Table 2).  
118 For each library, we calculated an RNA annotation category preference value, defined as the  
119 difference in the fraction of T-to-C reads per annotation category between each RBP library and  
120 the reference library. We performed hierarchical clustering of RBPs by annotation category  
121 preference, using Ward's method and Euclidean distances. This yielded eight clusters of binding  
122 preference (Figure 1a – orange line demarcates cluster definitions) with varying enrichment or  
123 depletion for individual or combinations of specific annotation categories. For each of these  
124 clusters, we compiled a detailed table summarizing the reported functions for each of the RBPs

125 (Table 1). Taken together, clustering by RNA annotation category separated RBPs into groups  
126 according to their known subcellular localization and functions.

127 Three of the eight clusters (clusters 2, 4, and 5) contained nine RBPs that exhibited preference  
128 for categories of non-coding RNA (rRNA, snRNA, snoRNA, and tRNA), but not mRNA,  
129 precursor mRNA (pre-mRNA), or lncRNA. The remaining five clusters contained 55 RBPs  
130 exhibiting preference for binding to mRNA, pre-mRNA and long-noncoding RNA (lncRNA)  
131 annotation categories. The RBPs in clusters 1, 6, 7, and 8 exhibited strong preferences for  
132 various mRNA annotation categories. The RBPs in cluster 3 did not exhibiting strong preference  
133 for specific mRNA annotation categories. Additionally, for each of the RBPs in the cluster, we  
134 performed a positional meta-analysis of binding sites with respect to major transcript landmarks  
135 within target mRNAs. Many of the RBPs also showed strong preferences for binding to specific  
136 positions within mRNAs relating to their role in specific steps of mRNA processing (Table 1).

137 We hypothesized that target annotation category preferences and positional binding preferences  
138 should reflect subcellular localization of the RBP and its role(s) in mRNA processing. Cluster 6  
139 contained twelve RBPs and exhibited strong preference for intronic regions and to a lesser  
140 degree 3' UTRs of mRNAs and lncRNAs. The intronic preference was consistent with the  
141 predominantly nuclear localization of these RBPs and the pre-mRNA splicing process. ELAVL1,  
142 which is the sole member of the ELAVL1 family of RBPs that is predominantly localized in the  
143 nucleus but capable of shuttling to the cytoplasm, exhibited positional binding flanking the end  
144 of the 3' UTR and for 5' and 3' splice sites. Cluster 8 contained fourteen RBPs and exhibited  
145 distinct preference for 3' UTR regions. This included the unpublished and predominantly  
146 cytoplasmic ELAVL1 family members, ELAVL2, ELAVL3, and ELAVL4, which exhibited a  
147 strong positional preference for binding in the distal region of the 3' UTR and acting

148 predominantly on mature mRNA (Mansfield and Keene, 2012). In summary, the annotation  
149 category preferences and positional binding preferences implicated the specific steps of mRNA  
150 processing the RBPs potentially regulate.

151

## 152 **The spectrum of RNA sequence specificity**

153 RBPs exist on a spectrum of specificity depending on a variety of primary and secondary  
154 structure features (Jankowsky and Harris, 2015). Here, our goal was to identify the RBPs with  
155 substantial primary sequence specificity and then examine their sequence preference. For each of  
156 the 55 RBPs, we counted all possible 6-mers using Jellyfish (Marçais and Kingsford, 2011) for  
157 the reads contributing to PARalyzer-defined binding sites. We observed 6-mer frequencies  
158 ranging as high as 512-fold to as low as 5-fold over a uniform distribution of 6-mers  
159 (Supplemental figure 2a). In contrast, our reference background library exhibited 16-fold  
160 enrichment of at least one 6-mer compared to uniform. AGO1-4 libraries were excluded from 6-  
161 mer analysis due to the overwhelming sequence contribution from crosslinked miRNAs. Twenty-  
162 seven RBPs did not have a single 6-mer found at higher frequency than present in the reference  
163 sample. Amongst these RBPs established or expected to display low sequence-specificity were  
164 the RNA helicase MOV10, the nuclear exosome component DIS3, and the EIF3 complex  
165 translation initiation factors.

166

167 For each of the 24 RBPs with stronger sequence enrichment than the reference library, we  
168 clustered the top 5 sequences enriched over the reference library (Figure 2). Our results  
169 recapitulated the sequence preference for the RBPs in this group with well-characterized  
170 sequence motifs (detailed in Table 2). The ELAVL1 family proteins, which bound to different



171 regions and positions of mRNA, showed similar preference for U- and AU-rich 6-mers, while  
172 ZFP36 only enriched a subset of the AU-rich 6-mers (Mukherjee et al., 2014). Complementing  
173 the 6-mer enrichment analysis, we performed motif analysis for each RBP library with the motif  
174 finding algorithm SSMART (sequence-structure motif identification for RNA-binding  
175 proteins, (Munteanu et al., 2018)) (Supplemental Fig 2b). For most RBPs, we observed strong  
176 concordance between the two analyses. RBM20 was a clear exception, for which we observed  
177 the established UCUU-containing motifs (Maatz et al., 2014) with SSMART, but a GA-rich  
178 sequence in the 6-mer enrichment analysis. However, we do observe UCUU-containing motifs in  
179 the top 15, but not top5 6-mers for RBM20. Altogether, our analysis was remarkably consistent  
180 with previously reported motifs in spite of differences in data processing and analysis (detailed  
181 Table 2).

182

### 183 **Identification of RNA regulatory modules**

184 To understand the functional impact of co-regulation by multiple RBPs, we analyzed the co-  
185 variation in binding patterns of all 55 RBPs across 13,299 target RNA encoding genes to probe  
186 for the existence of regulatory modules, i.e., specific subsets of RNAs implicated in similar  
187 function bound by subsets of RBPs. To this end, we employed Factor Analysis (FA), which  
188 reduces a large number of observed variables to a smaller number of latent *factors*. Here, our  
189 observed variables represented the normalized RBP binding (see methods) for each of the 55  
190 RBPs across all target RNA encoding genes (n=13,299). The latent *factors* represented similar  
191 binding patterns to RNA targets by one or more of the 55 RBPs. RBPs exhibiting high loadings  
192 for the same *factor* would have very similar binding patterns to RNA targets. Importantly in this

193 framework, a single RBP could be assigned to multiple *factors*, just as a single RBP can  
194 participate in multiple RNPs and regulate different aspects of RNA metabolism.

195  
196 The FA model decomposed the 55 x 13,299 normalized RBP binding matrix into a 55 x 10 factor  
197 loading matrix (representing the strength of the dependence of each of the 55 RBP target RNA  
198 binding pattern on each of the 10 *factors*), a 13,299 x 10 factor score coefficient matrix  
199 (representing the dependence between the binding of the 13,299 target RNA encoding gene and  
200 each of the 10 *factors*), and residual error (Supplemental Fig 3a and methods). Cumulatively, the  
201 FA model explained ~60% of the variance in the observed data. The remaining unexplained  
202 variance was expected due to the challenges of integrating data sets of varying depth and quality,  
203 in spite of our efforts to control these aspects. The communality, which is the amount of variance  
204 explained by the model for each RBP-binding variable, varied drastically for all 55 RBPs; the  
205 model explained at least 80% of the variance in enrichment scores for 12 RBPs, and at least 50%  
206 of the variance in enrichment scores for 30 RBPs (Supplemental Figure 3b). RBPs with lower  
207 communality often coincided with shallow depth of their PAR-CLIP libraries.

208  
209 The FA model also uncovered interesting parallels between the similarity in the binding of target  
210 RNA encoding genes and the target annotation category preferences (from Figure 1a). We  
211 observed that individual *factors* contained RBPs that preferred binding to either mature (Factors  
212 1, 3, 4, 5, 8) or precursor transcripts (Factors 2, 6), reflecting involvement in different stages of  
213 RNA metabolism (Figure 3a). Furthermore, individual *factors* contained RBPs exhibiting similar  
214 patterns of binding to specific regions of the mRNA (i.e., intron, coding, 3' UTR). Indeed, RBPs  
215 from the same family, or known to regulate a specific aspect of RNA processing, had high

216 loadings for the same *factors*. For example, the ELAVL1 family members were associated with  
217 Factor 1; the AGO1 family were associated with Factor 3; the IGF2BP1 family were associated  
218 with Factor 4; the FMR1 family had were associated with Factor 5 and Factor 8; LINE-1  
219 encoded proteins were associated with Factor 7. One of the unanticipated associations was that  
220 of HNRNPC with Factor 2, which contained man cleavage and polyadenylation factors.  
221 Interestingly, HNRNPC was shown to interact with U-rich sequences downstream of a viral  
222 poly-adenylation signal nearly three decades ago (Wilusz et al., 1988), and more recently, to  
223 repress cleavage and poly-adenylation in humans (Gruber et al., 2016). These examples highlight  
224 the specific testable hypotheses generated by an integrative analysis that are not necessarily  
225 obvious when examining a single RBP in isolation.

226  
227 By clustering the factor score coefficients, i.e. the specific linear combination of RBP binding for  
228 that target RNA, we identified target RNA encoding genes constituting putative regulatory  
229 modules associated with a given *factor*. Therefore, each regulatory module was associated with  
230 an RBP component (the subset of RBPs exhibiting similar binding pattern) and a RNA  
231 component (the subsets of target RNA encoding genes bound by those RBPs). These regulatory  
232 modules did not imply physical interactions between RBPs; rather, it identified RBPs that may  
233 cooperate in controlling RNA metabolism for specific subsets of RNA targets, possibly across  
234 cellular compartments. Almost a quarter of the target RNA encoding genes (3,180/13,299) were  
235 assigned to regulatory modules by exhibiting high factor score coefficients for a single *factor*  
236 (Supplemental figure 3c). We did not identify target RNA encoding genes with high factor score  
237 coefficients for Factor 9 or 10. The remaining target RNA encoding genes did not exhibit high  
238 factor score coefficients for any specific *factor* in our analysis, suggesting that the targets were

239 either not bound by specific combinations of these RBPs, bound broadly by all RBPs, or not  
240 bound by the subset of RBPs in the analysis. As such, we labeled this target RNA encoding gene  
241 category as “non-specific”. The RNA regulatory modules encoding genes were enriched for  
242 different GO categories. Factor 1 RNA regulatory modules were enriched for ‘AU-rich element  
243 binding’ and Factor 3 RNA regulatory modules were enriched for ‘gene silencing by miRNA’;  
244 AU-rich RBPs and AGO proteins were strongly associated with Factor 1 and Factor 3,  
245 respectively. This was consistent with the recurrent observation that RBPs target the mRNAs  
246 encoding themselves (Pullmann et al., 2007; Tenenbaum et al., 2000). In turn, the RNAs  
247 encoding “non-specific” genes contained ribosomal proteins and mitochondrial electron-  
248 transport proteins.

249

## 250 **RNA regulatory modules underlie distinct patterns of RNA metabolism**

251 In order to test the functional relevance of these RNA regulatory modules, we reasoned that  
252 perturbation (change of protein abundance or activity) of an RBP will lead to pronounced effects  
253 only for the RNA regulatory modules assigned to the specific *factor(s)* that RBP is associated  
254 with. We examined mature and precursor RNA expression changes induced by siRNA  
255 knockdown of ELAVL1 (Kishore et al., 2011). ELAVL1 was strongly associated with both  
256 Factor 1 and Factor 2, which exhibited RNA targeting patterns for mature or precursor RNAs,  
257 respectively. Concordantly, Factor 1 associated RNA regulatory modules, but not Factor 2 RNA  
258 regulatory modules, exhibited ELAVL1-dependent stabilization of mature RNA (Figure 4a).  
259 Likewise, Factor 2 RNA regulatory modules exhibited a more pronounced ELAVL1-dependent  
260 stabilization of precursor RNA than Factor 1 RNA regulatory modules (Figure 4b). Each human  
261 ELAV1 family protein contains three RRM domains (>90% sequence identity), but the hinge

262 region between the second and third RRM of ELAVL1 contains a shuttling sequence responsible  
263 for its nuclear localization (Fan and Steitz, 1998). Due to the lack of this shuttling sequence,  
264 ELAVL2/3/4 are predominantly cytoplasmic and were strongly associated with Factor 1, but not  
265 Factor 2. Taken together, the model was able to correctly identify and distinguish ELAVL1-  
266 dependent stabilization of both precursor and mature RNA (Lebedeva et al., 2011; Mukherjee et  
267 al., 2011).

268  
269 We hypothesized that the subsets of RNAs assigned to the different regulatory module would  
270 exhibit differences in RNA metabolism driven by the RBPs in the *factor* associated with the  
271 regulatory module. Therefore, we compared six aspects of RNA metabolism previously  
272 quantified in HEK293 cells (Mukherjee et al., 2017), for each of the RNA regulatory modules  
273 associated with each of the *factors*. The *factor*-associated RNA regulatory modules exhibited  
274 very distinct RNA metabolic profiles compared to each other and to non-specific category  
275 (Figure 4c, Supplemental Figure 4a). Factor 2 RNA regulatory modules, which was the only  
276 factor associated with RBPs binding to precursor mRNA and lncRNA, had low processing rates,  
277 high degradation rates and their encoded RNAs were preferentially localized in the nucleus  
278 versus the cytoplasm. Factor 2 RNA regulatory modules were strongly enriched for lncRNAs  
279 (Figure 4d). Indeed, these genes strongly overlapped with a set of lncRNAs likely to be  
280 functional (Supplemental figure 4b) (Mukherjee et al., 2017).

281  
282 We also examined regulatory differences in RNA metabolism for genes associated with  
283 cytoplasm-enriched factors. For example, factor 1 RNA regulatory modules were more stable  
284 than Factor 3 RNA regulatory modules (Figure 4c). Factor 1 was strongly associated with

285 ELAVL1 family proteins, which stabilize target mRNAs. Factor 3 was strongly associated with  
286 for AGO1 family proteins, which execute miRNA-mediated degradation of target mRNAs.  
287 Additionally, Factor 4 RNA regulatory modules, which are bound by IGF2BP1 family proteins,  
288 were highly synthesized, processed, stabilized, and translated (Figure 4c). The RNA targets of  
289 IGF2BP1 family RBPs were strongly localized to the ER (Supplemental Figure 4c) (Jønson et  
290 al., 2007), which is also consistent with the proposed role of IGF2BP1 family proteins for RNA  
291 localization and translation (Farina et al., 2003; Nielsen et al., 2001). Although correlative, these  
292 results indicate that different RBP binding patterns beget different consequences for RNA  
293 metabolism.

294

295 Specific RNA regulatory modules also exhibited preferential localization to processing bodies  
296 (P-bodies), which are cytoplasmic granules associated with translational repression (Sheth and  
297 Parker, 2003). Namely, Factor 3 RNA regulatory modules, which were strongly associated with  
298 the AGO1 family, were the most strongly enriched for localizing to P-bodies according to a  
299 recent study characterizing the transcriptome and proteome of P-bodies, and the AGO2 protein  
300 itself was 90-fold enriched (Hubstenberger et al., 2017). Similarly, Factor 5 RNA regulatory  
301 modules, which were strongly associated with the FMR1 family, were also enriched for  
302 localizing in P-bodies, along with the FMR1 protein (16-fold enriched). In contrast, the non-  
303 specific category was depleted from P-bodies.

304

305 Fine-tuning of gene expression has been postulated to be an important function of post-  
306 transcriptional regulation by RBP and miRNAs. Therefore, we examined the cell-to-cell  
307 variability in gene expression across 25 individual HEK293 cells with respect to the RNA

308 regulatory modules. The single-cell RNA-seq data was very deeply sequenced and generated  
309 using the massively parallel single-cell RNA-sequencing (MARS-Seq) protocol (Guillaumet-  
310 Adkins et al., 2017). Most RNA regulatory modules exhibited lower expression variability than  
311 the non-specific category (Figure 4e). In particular, Factor 4 RNA regulatory modules exhibited  
312 the lowest variation and highest median expression across the 25 cells (Supplemental Figure 4d).  
313 These results supported the broad notion that post-transcriptional gene regulation generally  
314 confers robustness and fine-tuning of gene expression.

315

## 316 **Conclusion**

317 Our study presents a curation of existing datasets, followed by systematic analysis of high-  
318 quality and high-resolution RBP-RNA interaction data. We focused on the RBPs that  
319 preferentially bound to mRNA and lncRNA and examined their sequence specificity and  
320 sequence motif preferences. Our survey of the RBP regulatory landscape identified the most  
321 prevalent subsets of RNAs targeted by a specific subset of RBPs, which we refer to as RNA  
322 regulatory modules.

323

324 We utilized high quality PAR-CLIP datasets for which the immunoprecipitation was generally  
325 comparable due to fact most RBPs were FLAG-tagged. Nevertheless, several caveats associated  
326 with the interpretation of this analysis need to be pointed out. Despite several measures of quality  
327 control to decide which datasets to include in our analysis, the libraries varied greatly in depth,  
328 quality, digestion biases and potentially other confounding variables with respect to the protocol.  
329 The FA model quantitatively assessed the degree to which we could explain the full complement  
330 of RBP-RNA target binding patterns. These confounders undoubtedly contributed to the ~40%

331 of variance not explained by the FA model. In comparison, the ENCODE eCLIP datasets (Van  
332 Nostrand et al., 2016) are likely to suffer from different confounders: they were generated using  
333 one consistent experimental protocol but used antibodies against endogenous proteins expressed  
334 at varying levels, and for which IP efficiency can vary greatly in spite of the quality control  
335 performed (Sundararaman et al., 2016). Essentially, this represents the trade-offs in experimental  
336 design between analyzing the endogenous protein compared to an epitope-tagged protein.  
337 Modifying the genomic loci of the protein to engineer an endogenous epitope tagged RBP is  
338 a very promising strategy.

339  
340 Assuming the RBPs investigated here are a representative sample of the ~1,542 RBPs encoded in  
341 the human genome, there may be an astounding number of RBPs with substantial primary  
342 sequence specificity. However, the degree of sequence specificity is determined by the nature of  
343 the RBP-RNA interaction, which can be quite extensive and specific, as in the case of Pumilio,  
344 or minimal and non-sequence specific, as in the case of an RNA-helicase. An interesting  
345 exception were the A-rich sequences enriched by UPF1, which is an RNA helicase and therefore  
346 unlikely to exhibit strong sequence specificity. One possible explanation is that such sequences  
347 may represent pre-mature polyA tail recognition involved in aspects of ribosome quality control  
348 demonstrated in yeast (Koutmou et al., 2015) and human cells (Garzia et al., 2017). Likewise,  
349 more examples of unanticipated sequence enrichments may shed light on novel RNA regulatory  
350 mechanisms.

351  
352 Our FA model was able to identify distinct RBP-RNA target regulatory modules. At the very  
353 minimum, 25% of target RNA encoding genes were assigned to RNA regulatory modules. This



354 is very likely an underestimation due to noisy data and a biased, far from complete sampling of  
355 RBPs. However, there is likely to be a subset of genes for which post-transcriptional gene  
356 regulation indeed plays a negligible role, at least in HEK293 cells. Furthermore, a small number  
357 of RBPs in our analysis are not endogenously expressed in HEK293 and their natural expression  
358 is tissue-specific and/or context-dependent. The approach presented here can scale to binding  
359 data for all ~700 RBPs experimentally shown to be associated with poly-adenylated RNA in  
360 HEK293 cells or even ~1,542 known RBPs (Baltz et al., 2012).

361  
362 The RNA regulatory modules exhibited different patterns of RNA processing, degradation,  
363 localization, and translation. We speculate that these differences in RNA metabolism were driven  
364 by individual RBPs or the combination of RBPs associated with that regulatory module. This  
365 was supported by the response of specific RNA regulatory modules to ELAVL1 knockdown  
366 (Figure 4A, B). Additionally, the RNA regulatory modules encoded functionally related proteins  
367 and similarly localized proteins. The enrichments were for proteins with similar molecular  
368 functions or multi-component complexes rather than signaling pathways (Supplemental Fig 3b).  
369 Altogether, these lines of evidence provide support for the coordinate regulation of ‘functionally  
370 coherent’ RNA regulatory modules as proposed by the post-transcriptional operon/regulon model  
371 (Keene, 2007). The ultimate test of this model would involve manipulating specific combinations  
372 of binding sites and RBPs. Our study provides the rationale for such experiments, which  
373 unfortunately remain technically challenging.

374  
375 Our observations have important implications for RBP-RNA regulatory networks and their  
376 importance in gene expression. The mRNA targets within specific regulatory modules encoded

377 the RBP themselves, a generalization of a commonly made observation that RBPs bind to the  
378 mRNAs encoding them (Mesarovic et al., 2004). Our analysis lends support for this frequently  
379 observed potential auto-regulatory feedback. These feedback loops may in fact buffer the  
380 expression range of the targeted mRNAs, including those of the RBP. In this context, the  
381 observation that the RNA regulatory modules exhibited lower cell-to-cell gene expression  
382 variance, provides more evidence for the importance of post-transcriptional regulation in  
383 buffering transcriptional noise (Bahar Halpern et al., 2015; Battich et al., 2015). Systematic  
384 perturbation of individual and combinations of RBPs will be quite powerful in revealing  
385 fundamental properties of RNA regulatory networks such as auto-regulatory feedback and  
386 buffering.

387  
388 The binding preference and targets of the vast majority of human RBPs remains unknown. The  
389 insights gained from this study demonstrate the value of large-scale efforts by ENCODE and  
390 others in the community to globally identify RBP binding sites. Of the 64 RBPs in this study, 44  
391 were not represented in the ENCODE cell lines. Cumulatively these efforts interrogate ~10% of  
392 human RBPs with known RNA-binding domains. Thus, these two large scale efforts offer the  
393 potential to complement one another in our continuing attempts to understanding RBP-RNA  
394 regulatory networks, for which we have only glimpsed the tip of the iceberg.

395

## 396 **Methods**

### 397 **Processing, filtering, and quality control of PAR-CLIP libraries**

398 Each PAR-CLIP library was subject to two rounds of quality control. First, all PAR-CLIP  
399 libraries generated in HEK293 cells were subject to the quality control pipeline PAR-CLIP Suite

400 v1.0 ([https://rnaworld.rockefeller.edu/PARCLIP\\_suite/](https://rnaworld.rockefeller.edu/PARCLIP_suite/)). Using raw Illumina sequencing data,  
401 this pipeline identified the predominant target RNA category or categories for each RBP and  
402 provided the T-to-C conversion frequency resolved by read length and RNA category  
403 (Supplemental Fig 1). The mapped reads of each RNA category were resolved by error distance  
404 0 (d0), error distance 1 (d1; split in T-to-C and d1 other than T-to-C), and error distance 2 (d2).  
405 This process discriminated for each library true target RNA categories from non-crosslinked  
406 background RNA categories populated by fragments of abundant cellular RNAs. In order to  
407 disqualify experiments comprising too many non-crosslinked RBP-specifically bound RNAs or  
408 co-purified non-crosslinked background RNAs, we pursued only datasets which collect at least  
409 10,000 redundant d1 reads  $\geq 20$  nt in at least one of major RNA annotation categories with  $d1(\text{T-}$   
410  $\text{to-C})/(d0 + d1) \geq 30\%$ , and  $d1(\text{T-to-C})/(d1\text{-total}) \geq 65\%$ .

411 For the libraries passing the first threshold, we defined and annotated binding sites using  
412 PARpipe, which is a pipeline wrapper for PARalyzer (Corcoran et al., 2011; Mukherjee et al.,  
413 2014). The threshold for additional filtering were determined by comparisons with the reference  
414 library (Friedersdorf and Keene, 2014). This reference library was generated using a modified  
415 PAR-CLIP protocol in which there was no immunoprecipitation and the addition of an rRNA  
416 depletion step after proteinase K digestion, followed by a partial digestion using RNase T1. We  
417 required libraries had to have an average fraction T-to-C over remaining reads greater than 0.32  
418 (the average fraction T-to-C over remaining reads greater of the reference library), an average  
419 conversion specificity greater than 0, more than 20000 aligned reads, not be digested only with  
420 micrococcal nuclease, a redundant read copy fraction less than .98 (Supplemental Fig 1b,c and  
421 Sup Table 1). For RBPs with three or more libraries, we removed outlier based on correlation of  
422 6-mer frequency calculated from PARalyzer-utilized reads.

423

#### 424 **Annotation category preference and positional analysis of binding density**

425 For calculating the annotation category preference, we calculated the difference in the fraction of  
426 T-to-C reads per annotation category between each RBP library and the reference library. For  
427 example, if the fraction of miRNA annotated reads with T-to-C transitions in a specific RBP  
428 library was 0.20 compared to 0.05 in the reference library, the miRNA preference value for this  
429 specific RBP is 0.15. For the positional binding analysis, we selected genes (n=15120) using  
430 GENCODE v19 as annotation based on our earlier work on HEK293 RNA processing and  
431 turnover dynamics (Mukherjee et al., 2017). Isoform expression was calculated using RSEM (Li  
432 and Dewey, 2011). For each gene, we selected the transcript isoform with the highest isoform  
433 percentage or chose one randomly in case of ties (n=8298). The list of selected transcript  
434 isoforms was used to calculate the median 5' UTR, CDS and 3' UTR length proportions (5'  
435 UTR=0.06, CDS=0.53, 3' UTR=0.41) using R Bioconductor packages GenomicFeatures and  
436 GenomicRanges. For regions downstream annotated transcription ends (TES) and adjacent to  
437 splice sites, we chose windows of fixed sizes (TES 500nt, 5' and 3' splice sites 250nt each). We  
438 generated coverage tracks from the PARalyzer output alignment files and intersected those with  
439 the filtered transcripts. Each annotation category was binned according to its relative coverage  
440 averaged according to each bin. For intronic coverage, we averaged across all introns per gene,  
441 given a minimal intron length of 500nt. All bins were stitched to one continuous track per  
442 transcript. Altogether 6632 intron containing transcripts showed coverage in at least one  
443 PARCLIP library. For each library, we required transcripts to have a minimal coverage  
444 maximum of  $> 2$ . For each transcript, we scaled the binned coverage dividing by its maximal  
445 coverage (min-to-1 scaling) to emphasize spatial patterns independent from transcript expression

446 levels. Replicate RBP PARCLIP libraries were combined at this point. Transcripts targeted in  
447 more than one replicate library were aggregated using the average of their binned coverage.  
448 RBPs with less than 50 filtered target transcripts (after aggregation) were not considered. Next,  
449 we split transcript coverage in two parts, separating 5' UTR to TES regions and intronic regions.  
450 To generate the scaled meta coverage across all targeted transcripts per RBP, we used the  
451 heatMeta function from the Genomation package. For the 5'UTR to TES, we scaled each RBP  
452 meta-coverage track independent of other RBPs. For each RBP, we subtracted the scaled meta  
453 coverage of PARCLIP reference library (Friedersdorf and Keene, 2014). For intronic sequences,  
454 we scaled each RBP relative to all other RBPs to highlight RBPs with more substantial intronic  
455 binding patterns. Finally, we visualized the density using pheatmap.

456

#### 457 **Sequence analysis**

458 We calculated 6-mer frequencies with Jellyfish from all reads that generated a PARalyzer  
459 binding site for each library. For each RBP, we selected the library with the lowest percent of  
460 duplicated sequences (see supplemental table 1) to serve as a representative library for the  
461 sequence analysis and factor analysis. For each RBP, we counted the number of 6-mers with a  
462 frequency of  $x$  or higher, where  $x$  was from  $1/4096$  to  $1/4$ . To evaluate the 6-mers enriched by a  
463 given RBP relative to the reference library, we regressed the RBP 6-mer frequency against the  
464 the reference library 6-mer frequency and collected the residuals (the unexplained variance).  
465 Next, identified all 6-mers that were found as the top 5 enriched over the reference library for  
466 any of the analyzed RBPs. We clustered the enrichment scores for the 6-mers across all RBPs  
467 and generated a heatmap using the 'aheatmap' function in NMF R package. We ran SSMART

468 using all binding sites found in mRNA-derived annotation categories ranked by the library size  
469 normalized enrichment over the reference library.

#### 470 **Factor analysis**

471 For each site identified we calculated a library size normalized enrichment compared to the the  
472 reference library library. We calculated the sum of all enrichment scores for all sites annotated as  
473 mRNA and lncRNA. Next, we normalized for expression levels (collected the residuals) to  
474 create the final matrix of values. The number of factors, 10, was determined using the majority  
475 result of numerous methods to estimate the number of factors. Clustering of the score matrix was  
476 performed using the most stable results from numerous iterations of k-means clustering.

477

#### 478 **Gene ontology analysis**

479 Multiple-test corrected gene ontology enrichment values were calculated using the TOPGO R  
480 package. For each set of genes, we used all 13,299 genes in the factor analysis as the background  
481 or gene universe. Enrichment was calculated using the ‘parent-child’ approach on the top 100  
482 enriched terms. This metric accounts for the hierarchical organization of gene ontology terms to  
483 minimize false-positive enrichments. We performed a Bonferonni multiple test correction on the  
484 enrichment p-values.

485

#### 486 **Premature and mature RNA quantification**

487 Mature- and premature-transcript expression, transcripts per million (TPM), was quantified with  
488 RSEMv1.2.11 (<http://deweylab.biostat.wisc.edu/rsem/src/rsem-1.2.11.tar.gz>) as described  
489 previously (Mukherjee et al., 2017). Briefly, for each gene we included an additional isoform

490 corresponding to the sequence of the full gene locus. Specifically, we modified the  
491 GENCODEv19 gtf and used this as the input for the ‘rsem-prepare-reference’ function to  
492 generate a modified index used for quantification. For each gene, we calculated the expression of  
493 ‘mature’ RNA as the sum of all isoforms for that gene excluding the ‘primary’ transcript. For  
494 intronless genes, premature and mature expression values were summed. We performed this  
495 analysis on the ELAVL1 knockdown RNA-seq experiments (Kishore et al., 2011).

496

#### 497 **Cell-to-cell expression variability**

498 RNA-seq gene expression data for 25 individual HEK293 cells were downloaded from  
499 (Guillaumet-Adkins et al., 2017). We calculated the coefficient of variation (100\*standard  
500 deviation/mean) for each gene across all 25 cells.

## 501 **Figure Legends**

502 **Figure 1. RBP analyzed and binding preferences by RNA category.** A) Heatmap of reference  
503 normalized annotation category preference for each RBP clustered into 8 branches by color  
504 (left). The heatmap represents the difference in the proportion of sites for a given annotation  
505 category in the RBP library versus the reference library. Heatmap of the reference library  
506 normalized relative positional binding preference of the 55 RBPs with enriched binding in at  
507 least one mRNA-relevant annotation category per branch (right). RBP-specific binding  
508 preferences were averaged across selected transcripts (see methods). The relative spatial  
509 proportion of 5'UTR, coding regions and 3'UTR were averaged across all selected transcript  
510 isoforms. For TES (regions beyond transcription end site), 5' splice site, and 3' splice site, we  
511 chose fixed windows (250nt for TES and 500nt for splice sites). For each RBP, meta-coverage  
512 was scaled between 5'UTR to TES. The 5' and 3' intronic splice site coverage was scaled  
513 separately from other regions but relative to each other.

514

515 **Figure 2. RBP binding sequence specificity and elements.** A) Heatmap of reference  
516 normalized 6-mer enrichment for top 5 enriched 6-mers for each RBP in the set of RBPs  
517 exhibiting more sequence specificity than the reference.

518

519 **Figure 3. RNA regulatory modules.** A) Factor analysis of target RNA encoding genes binding  
520 normalized by the reference library and expression for the 55 RBPs binding to mRNAs and  
521 lncRNAs for 13,299 genes (see 'factor analysis' section in methods for details). Spring-  
522 embedded graph of the factor loading matrix, indicating the association between each of the 55  
523 RBPs and one of the 10 factors. Nodes color-coded by RNA annotation category preference



524 cluster membership from figure 1. Edge width scales with factor loadings (thicker edge = higher  
525 factor loading = stronger association). Only edges with a factor loading  $> 0.2$  (positive values in  
526 black) or  $< -0.2$  (negative values in green) depicted.

527

528 **Figure 4. Functional characterization of RNA regulatory modules.** A) The difference in  
529 either A) primary or B) mature RNA expression (transcripts per million) upon ELAVL1  
530 knockdown by siRNA treatment (y-axis), specifically the  $\log_2[\text{siRNA EGFP TPM}] - \log_2[\text{siRNA}$   
531  $\text{ELAVL1 TPM}]$ , for each gene set. C) Heatmap of the median value of synthesis rate, processing  
532 rates, degradation rates, cytoplasmic versus nuclear localization, polyribosomal versus  
533 cytoplasmic localization, and translational status from ribosome profiling data for each gene set  
534 (top). Heatmap of the odds-ratio of the overlap between factor associated gene sets with  
535 annotation (bottom). D) Box-and-whisker plot for each gene set of the enrichment in P-bodies.  
536 E) Box-and-whisker plot for each gene set of the coefficient of variation across 25 individual  
537 HEK293 cells.

538

539 **Supplemental Figure 1. QC filtering of libraries.** A) Description of PAR-CLIP suite to assess  
540 library quality control per annotation category (left). Example of number of reads mapping to  
541 each RNA category with up to 2 mismatches resolved by length of adapter-extracted sequence  
542 reads for an ELAVL1 library (middle). Sequencing read composition of the most abundant RNA  
543 category for the ELAVL1 library. Reads were assigned as d0 (white), d1 T-to-C (red), d1 other  
544 than T-to-C, (light gray), and d2 (black) (right). B) Libraries had to have  $> 20,000$  aligned reads  
545 and a mean conversion specificity  $> 0$ , and a higher mean T-to-C fraction than the the reference  
546 library (red lower, blue higher). C) Number of libraries analyzed and their quality control status.

547 D) Count of libraries passing QC per RBP. E) Examples of outlier library removal (libraries  
548 labeled with red text were removed) based on correlation of read 6-mer frequency for RBPs with  
549 3 or more libraries.

550

551 **Supplemental Figure 2. Grouping RBPs by sequence specificity.** A) Heatmap of the number  
552 of 6-mers enriched per RBP at different specificity thresholds. The color scale represents the  $\log_2$   
553 [number of 6-mers] that are enriched at a given threshold (y-axis). The thresholds are represented  
554 as  $\log_2$  [6-mer frequency]. There are 4096 different 6-mers and if they were uniformly present  
555 this would represent a value of  $-12 = \log_2 [1/4096]$ . The horizontal dashed lines at -8, represents  
556 16-fold enrichment over a uniform background. For reference, the vertical dashed lines indicate  
557 the behavior of the reference library. B) Top 3 SSMART motif results using all binding sites  
558 found in mRNA-derived annotation categories ranked by the library size normalized enrichment  
559 over reference library.

560

561 **Supplemental Figure 3. Factor analysis model selection and performance.** A) Plot  
562 of eigenvalues versus number of factors to determine the optimal number of factors using four  
563 methods (different colors). B) Barplot of the communality, or the variance in a given RBP  
564 cumulatively explained by the all factors. C) Heatmap of the median factor score coefficient  
565 value for all genes that clustered together. The number of genes assigned to a specific factor and  
566 the top two most significant enriched GO annotations for each ontology class: molecular  
567 function (MF), cellular component (CC), and biological process (BP).

568

569

570 **Supplemental Figure 4. RNA metabolism profiles for factor-associated gene sets.** A) Box-  
571 and-whisker plot for each gene set of the synthesis rates, processing rates, degradation rates,  
572 cytoplasmic versus nuclear localization (Cyt vs Nuc), polyribosomal versus cytoplasmic  
573 localization (Poly vs Cyt), and translational status from ribosome profiling data. B) Heatmap of  
574 the odds-ratio of the overlap between factor associated gene sets with RNA categories based on  
575 similar metabolic profiles from (Mukherjee et al., 2017). C) Heatmap of the odds-ratio of the  
576 overlap between factor associated gene sets and protein localization annotation. D) Box-and-  
577 whisker plot for each gene set of the median expression across 25 HEK293 cells.

578

579

580 Bahar Halpern, K., Caspi, I., Lemze, D., Levy, M., Landen, S., Elinav, E., Ulitsky, I., Itzkovitz,  
581 S., 2015. Nuclear Retention of mRNA in Mammalian Tissues. *Cell Rep* 13, 2653–2662.  
582 doi:10.1016/j.celrep.2015.11.036  
583 Baltz, A.G., Munschauer, M., Schwanhäusser, B., Vasile, A., Murakawa, Y., Schueler, M.,  
584 Youngs, N., Penfold-Brown, D., Drew, K., Milek, M., Wyler, E., Bonneau, R., Selbach, M.,  
585 Dieterich, C., Landthaler, M., 2012. The mRNA-bound proteome and its global occupancy  
586 profile on protein-coding transcripts. *Mol. Cell* 46, 674–690.  
587 doi:10.1016/j.molcel.2012.05.021  
588 Battich, N., Stoeger, T., Pelkmans, L., 2015. Control of Transcript Variability in Single  
589 Mammalian Cells. *Cell* 163, 1596–1610. doi:10.1016/j.cell.2015.11.018  
590 Cooper, T.A., Wan, L., Dreyfuss, G., 2009. RNA and Disease. *Cell* 136, 777–793.  
591 doi:10.1016/j.cell.2009.02.011  
592 Corcoran, D.L., Georgiev, S., Mukherjee, N., Gottwein, E., Skalsky, R.L., Keene, J.D., Ohler,  
593 U., 2011. PARalyzer: definition of RNA binding sites from PAR-CLIP short-read sequence  
594 data. *Genome Biol.* 12, R79. doi:10.1186/gb-2011-12-8-r79  
595 Fan, X.C., Steitz, J.A., 1998. HNS, a nuclear-cytoplasmic shuttling sequence in HuR. *Proc. Natl.*  
596 *Acad. Sci. U.S.A.* 95, 15293–15298.  
597 Farina, K.L., Hüttelmaier, S., Musunuru, K., Darnell, R., Singer, R.H., 2003. Two ZBP1 KH  
598 domains facilitate  $\beta$ -actin mRNA localization, granule formation, and cytoskeletal  
599 attachment. *The Journal of Cell Biology* 160, 77–87. doi:10.1083/jcb.200206003  
600 Fredericks, A.M., Cygan, K.J., Brown, B.A., Fairbrother, W.G., 2015. RNA-Binding Proteins:  
601 Splicing Factors and Disease. *Biomolecules* 5, 893–909. doi:10.3390/biom5020893  
602 Friedersdorf, M.B., Keene, J.D., 2014. Advancing the functional utility of PAR-CLIP by  
603 quantifying background binding to mRNAs and lncRNAs. *Genome Biol.* 15, R2.  
604 doi:10.1186/gb-2014-15-1-r2  
605 Garzia, A., Meyer, C., Morozov, P., Sajek, M., Tuschl, T., 2017. Optimization of PAR-CLIP for

- 606 transcriptome-wide identification of binding sites of RNA-binding proteins. *Methods* 118-  
607 119, 24–40. doi:10.1016/j.ymeth.2016.10.007
- 608 Gerstberger, S., Hafner, M., Tuschl, T., 2014. A census of human RNA-binding proteins. *Nature*  
609 *Reviews Genetics* 15, 829–845. doi:10.1038/nrg3813
- 610 Gruber, A.J., Schmidt, R., Gruber, A.R., Martin, G., Ghosh, S., Belmadani, M., Keller, W.,  
611 Zavolan, M., 2016. A comprehensive analysis of 3' end sequencing data sets reveals novel  
612 polyadenylation signals and the repressive role of heterogeneous ribonucleoprotein C on  
613 cleavage and polyadenylation. *Genome Res.* 26, 1145–1159. doi:10.1101/gr.202432.115
- 614 Guillaumet-Adkins, A., Rodríguez-Esteban, G., Mereu, E., Mendez-Lago, M., Jaitin, D.A.,  
615 Villanueva, A., Vidal, A., Martínez-Martí, A., Felip, E., Vivancos, A., Keren-Shaul, H.,  
616 Heath, S., Gut, M., Amit, I., Gut, I., Heyn, H., 2017. Single-cell transcriptome conservation  
617 in cryopreserved cells and tissues. *Genome Biol.* 18, 45. doi:10.1186/s13059-017-1171-9
- 618 Hafner, M., Landthaler, M., Burger, L., Khorshid, M., Hausser, J., Berninger, P., Rothballer, A.,  
619 Ascano, M., Jungkamp, A.-C., Munschauer, M., Ulrich, A., Wardle, G.S., Dewell, S.,  
620 Zavolan, M., Tuschl, T., 2010. Transcriptome-wide identification of RNA-binding protein  
621 and microRNA target sites by PAR-CLIP. *Cell* 141, 129–141.  
622 doi:10.1016/j.cell.2010.03.009
- 623 Hubstenberger, A., Courel, M., Bénard, M., Souquere, S., Ernoult-Lange, M., Chouaib, R., Yi,  
624 Z., Morlot, J.-B., Munier, A., Fradet, M., Daunesse, M., Bertrand, E., Pierron, G.,  
625 Mozziconacci, J., Kress, M., Weil, D., 2017. P-Body Purification Reveals the Condensation  
626 of Repressed mRNA Regulons. *Mol. Cell* 68, 144–157.e5. doi:10.1016/j.molcel.2017.09.003
- 627 Jankowsky, E., Harris, M.E., 2015. Specificity and nonspecificity in RNA-protein interactions.  
628 *Nat. Rev. Mol. Cell Biol.* 16, 533–544. doi:10.1038/nrm4032
- 629 Jønson, L., Vikesaa, J., Krogh, A., Nielsen, L.K., Hansen, T.V., Borup, R., Johnsen, A.H.,  
630 Christiansen, J., Nielsen, F.C., 2007. Molecular composition of IMP1 ribonucleoprotein  
631 granules. *Mol. Cell Proteomics* 6, 798–811. doi:10.1074/mcp.M600346-MCP200
- 632 Keene, J.D., 2007. RNA regulons: coordination of post-transcriptional events. *Nature Reviews*  
633 *Genetics* 8, 533–543. doi:10.1038/nrg2111
- 634 Kishore, S., Jaskiewicz, L., Burger, L., Hausser, J., Khorshid, M., Zavolan, M., 2011. A  
635 quantitative analysis of CLIP methods for identifying binding sites of RNA-binding proteins.  
636 *Nat. Methods* 8, 559–564. doi:10.1038/nmeth.1608
- 637 Koutmou, K.S., Schuller, A.P., Brunelle, J.L., Radhakrishnan, A., Djuranovic, S., Green, R.,  
638 2015. Ribosomes slide on lysine-encoding homopolymeric A stretches. *Elife* 4, 446.  
639 doi:10.7554/eLife.05534
- 640 König, J., Zarnack, K., Rot, G., Curk, T., Kayikci, M., Zupan, B., Turner, D.J., Luscombe, N.M.,  
641 Ule, J., 2010. iCLIP reveals the function of hnRNP particles in splicing at individual  
642 nucleotide resolution. *Nat. Struct. Mol. Biol.* 17, 909–915. doi:10.1038/nsmb.1838
- 643 Lebedeva, S., Jens, M., Theil, K., Schwanhäusser, B., Selbach, M., Landthaler, M., Rajewsky,  
644 N., 2011. Transcriptome-wide analysis of regulatory interactions of the RNA-binding protein  
645 HuR. *Mol. Cell* 43, 340–352. doi:10.1016/j.molcel.2011.06.008
- 646 Li, B., Dewey, C.N., 2011. RSEM: accurate transcript quantification from RNA-Seq data with or  
647 without a reference genome. *BMC Bioinformatics* 12, 323. doi:10.1186/1471-2105-12-323
- 648 Maatz, H., Jens, M., Liss, M., Schafer, S., Heinig, M., Kirchner, M., Adami, E., Rintisch, C.,  
649 Dauksaite, V., Radke, M.H., Selbach, M., Barton, P.J.R., Cook, S.A., Rajewsky, N.,  
650 Gotthardt, M., Landthaler, M., Hubner, N., 2014. RNA-binding protein RBM20 represses  
651 splicing to orchestrate cardiac pre-mRNA processing. *J. Clin. Invest.* 124, 3419–3430.

- 652 doi:10.1172/JCI74523
- 653 Mansfield, K.D., Keene, J.D., 2012. Neuron-specific ELAV/Hu proteins suppress HuR mRNA  
654 during neuronal differentiation by alternative polyadenylation. *Nucleic Acids Res.* 40, 2734–  
655 2746. doi:10.1093/nar/gkr1114
- 656 Marçais, G., Kingsford, C., 2011. A fast, lock-free approach for efficient parallel counting of  
657 occurrences of k-mers. *Bioinformatics* 27, 764–770. doi:10.1093/bioinformatics/btr011
- 658 Martin, G., Gruber, A.R., Keller, W., Zavolan, M., 2012. Genome-wide analysis of pre-mRNA  
659 3' end processing reveals a decisive role of human cleavage factor I in the regulation of 3'  
660 UTR length. *Cell Rep* 1, 753–763. doi:10.1016/j.celrep.2012.05.003
- 661 Mesarovic, M.D., Sreenath, S.N., Keene, J.D., 2004. Search for organising principles:  
662 understanding in systems biology. *Syst Biol (Stevenage)* 1, 19–27.
- 663 Moore, M.J., 2005. From birth to death: the complex lives of eukaryotic mRNAs. *Science* 309,  
664 1514–1518. doi:10.1126/science.1111443
- 665 Mukherjee, N., Calviello, L., Hirsekorn, A., de Pretis, S., Pelizzola, M., Ohler, U., 2017.  
666 Integrative classification of human coding and noncoding genes through RNA metabolism  
667 profiles. *Nat. Struct. Mol. Biol.* 24, 86–96. doi:10.1038/nsmb.3325
- 668 Mukherjee, N., Corcoran, D.L., Nusbaum, J.D., Reid, D.W., Georgiev, S., Hafner, M., Ascano,  
669 M., Tuschl, T., Ohler, U., Keene, J.D., 2011. Integrative regulatory mapping indicates that  
670 the RNA-binding protein HuR couples pre-mRNA processing and mRNA stability. *Mol.*  
671 *Cell* 43, 327–339. doi:10.1016/j.molcel.2011.06.007
- 672 Mukherjee, N., Jacobs, N.C., Hafner, M., Kennington, E.A., Nusbaum, J.D., Tuschl, T.,  
673 Blackshear, P.J., Ohler, U., 2014. Global target mRNA specification and regulation by the  
674 RNA-binding protein ZFP36. *Genome Biol.* 15, R12. doi:10.1186/gb-2014-15-1-r12
- 675 Munteanu, A., Mukherjee, N., Ohler, U., 2018. SSMART: Sequence-structure motif  
676 identification for RNA-binding proteins. bioRxiv 287953. doi:10.1101/287953
- 677 Nielsen, F.C., Nielsen, J., Christiansen, J., 2001. A family of IGF-II mRNA binding proteins  
678 (IMP) involved in RNA trafficking. *Scand. J. Clin. Lab. Invest. Suppl.* 234, 93–99.
- 679 Pandit, S., Zhou, Y., Shiue, L., Coutinho-Mansfield, G., Li, H., Qiu, J., Huang, J., Yeo, G.W.,  
680 Ares, M., Fu, X.-D., 2013. Genome-wide analysis reveals SR protein cooperation and  
681 competition in regulated splicing. *Mol. Cell* 50, 223–235. doi:10.1016/j.molcel.2013.03.001
- 682 Pullmann, R., Kim, H.H., Abdelmohsen, K., Lal, A., Martindale, J.L., Yang, X., Gorospe, M.,  
683 2007. Analysis of turnover and translation regulatory RNA-binding protein expression  
684 through binding to cognate mRNAs. *Mol. Cell. Biol.* 27, 6265–6278.  
685 doi:10.1128/MCB.00500-07
- 686 Sheth, U., Parker, R., 2003. Decapping and decay of messenger RNA occur in cytoplasmic  
687 processing bodies. *Science* 300, 805–808. doi:10.1126/science.1082320
- 688 Sundararaman, B., Zhan, L., Blue, S.M., Stanton, R., Elkins, K., Olson, S., Wei, X., Van  
689 Nostrand, E.L., Pratt, G.A., Huelga, S.C., Smalec, B.M., Wang, X., Hong, E.L., Davidson,  
690 J.M., Lécuyer, E., Graveley, B.R., Yeo, G.W., 2016. Resources for the Comprehensive  
691 Discovery of Functional RNA Elements. *Mol. Cell* 61, 903–913.  
692 doi:10.1016/j.molcel.2016.02.012
- 693 Tenenbaum, S.A., Carson, C.C., Lager, P.J., Keene, J.D., 2000. Identifying mRNA subsets in  
694 messenger ribonucleoprotein complexes by using cDNA arrays. *Proc. Natl. Acad. Sci.*  
695 *U.S.A.* 97, 14085–14090. doi:10.1073/pnas.97.26.14085
- 696 Ule, J., Jensen, K.B., Ruggiu, M., Mele, A., Ule, A., Darnell, R.B., 2003. CLIP identifies Nova-  
697 regulated RNA networks in the brain. *Science* 302, 1212–1215.

698 doi:10.1126/science.1090095  
699 Van Nostrand, E.L., Pratt, G.A., Shishkin, A.A., Gelboin-Burkhart, C., Fang, M.Y.,  
700 Sundararaman, B., Blue, S.M., Nguyen, T.B., Surka, C., Elkins, K., Stanton, R., Rigo, F.,  
701 Guttman, M., Yeo, G.W., 2016. Robust transcriptome-wide discovery of RNA-binding  
702 protein binding sites with enhanced CLIP (eCLIP). *Nat. Methods* 13, 508–514.  
703 doi:10.1038/nmeth.3810  
704 Wilusz, J., Feig, D.I., Shenk, T., 1988. The C proteins of heterogeneous nuclear  
705 ribonucleoprotein complexes interact with RNA sequences downstream of polyadenylation  
706 cleavage sites. *Mol. Cell. Biol.* 8, 4477–4483.  
707 Zhang, C., Frias, M.A., Mele, A., Ruggiu, M., Eom, T., Marney, C.B., Wang, H., Licatalosi,  
708 D.D., Fak, J.J., Darnell, R.B., 2010. Integrative modeling defines the Nova splicing-  
709 regulatory network and its combinatorial controls. *Science* 329, 439–443.  
710 doi:10.1126/science.1191150  
711 Zhao, J., Ohsumi, T.K., Kung, J.T., Ogawa, Y., Grau, D.J., Sarma, K., Song, J.J., Kingston, R.E.,  
712 Borowsky, M., Lee, J.T., 2010. Genome-wide identification of polycomb-associated RNAs  
713 by RIP-seq. *Mol. Cell* 40, 939–953. doi:10.1016/j.molcel.2010.12.011  
714

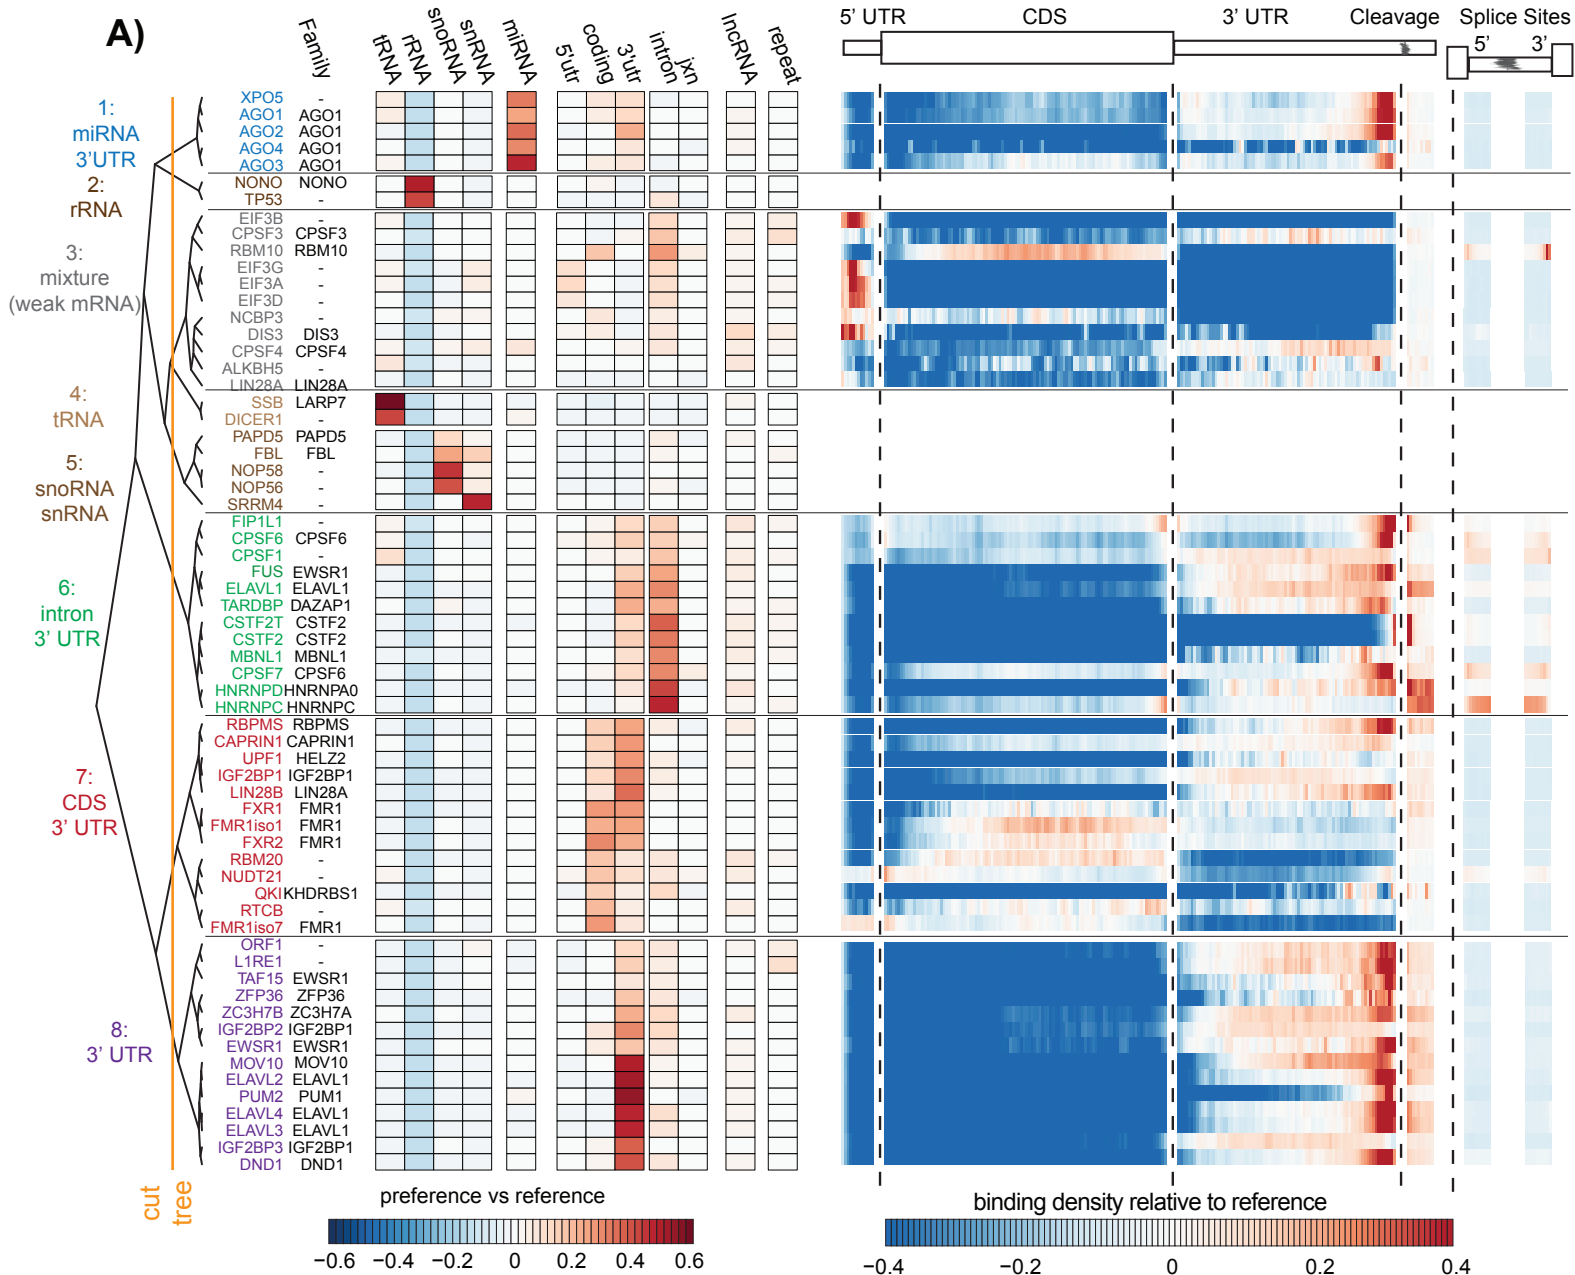





**A)**

bioRxiv preprint doi: <https://doi.org/10.1101/295097>; this version posted April 5, 2018. The copyright holder for this preprint (which was not certified by peer review) is the author/funder, who has granted bioRxiv a license to display the preprint in perpetuity. It is made available under aCC-BY-NC-ND 4.0 International license.

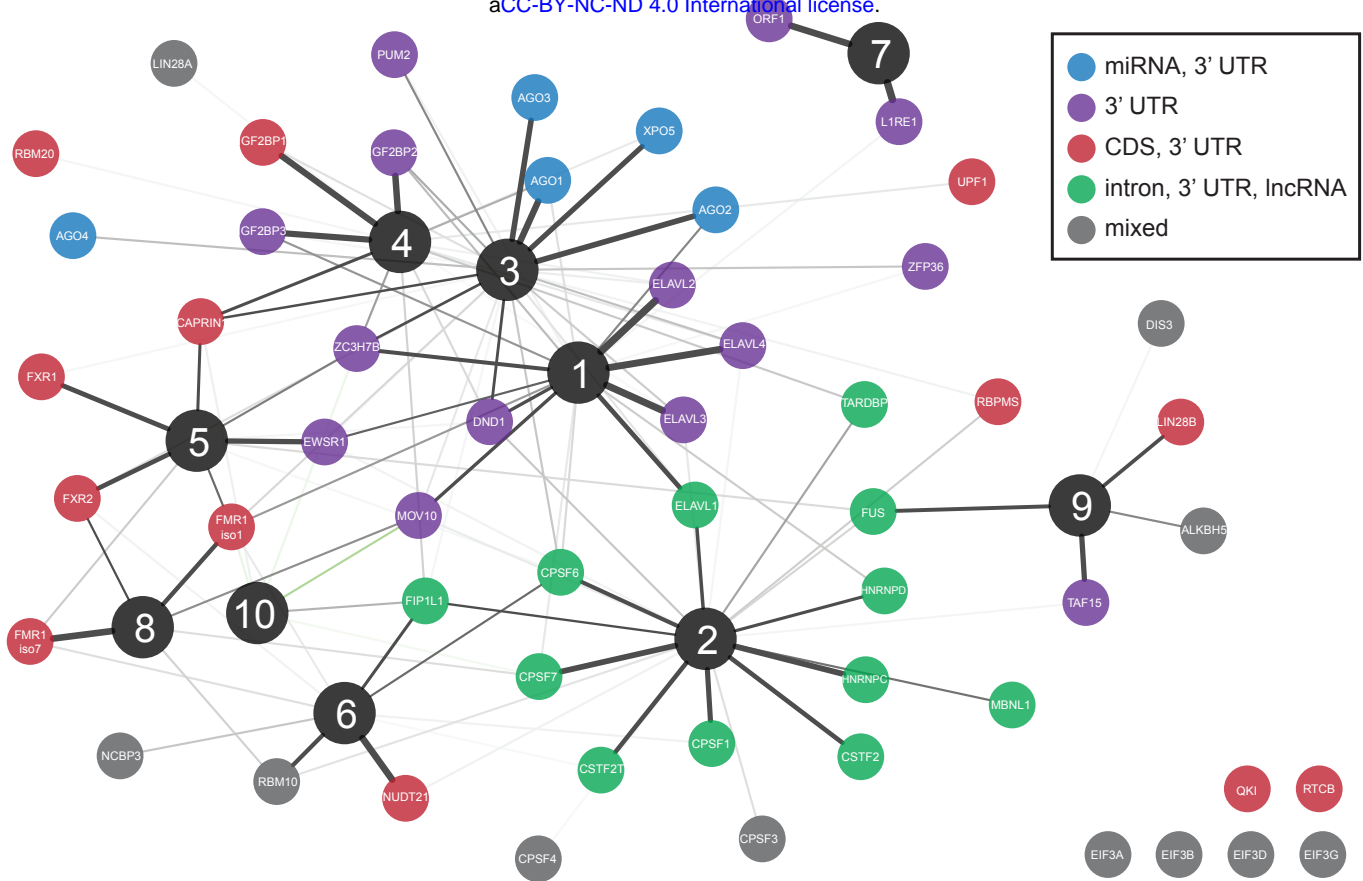

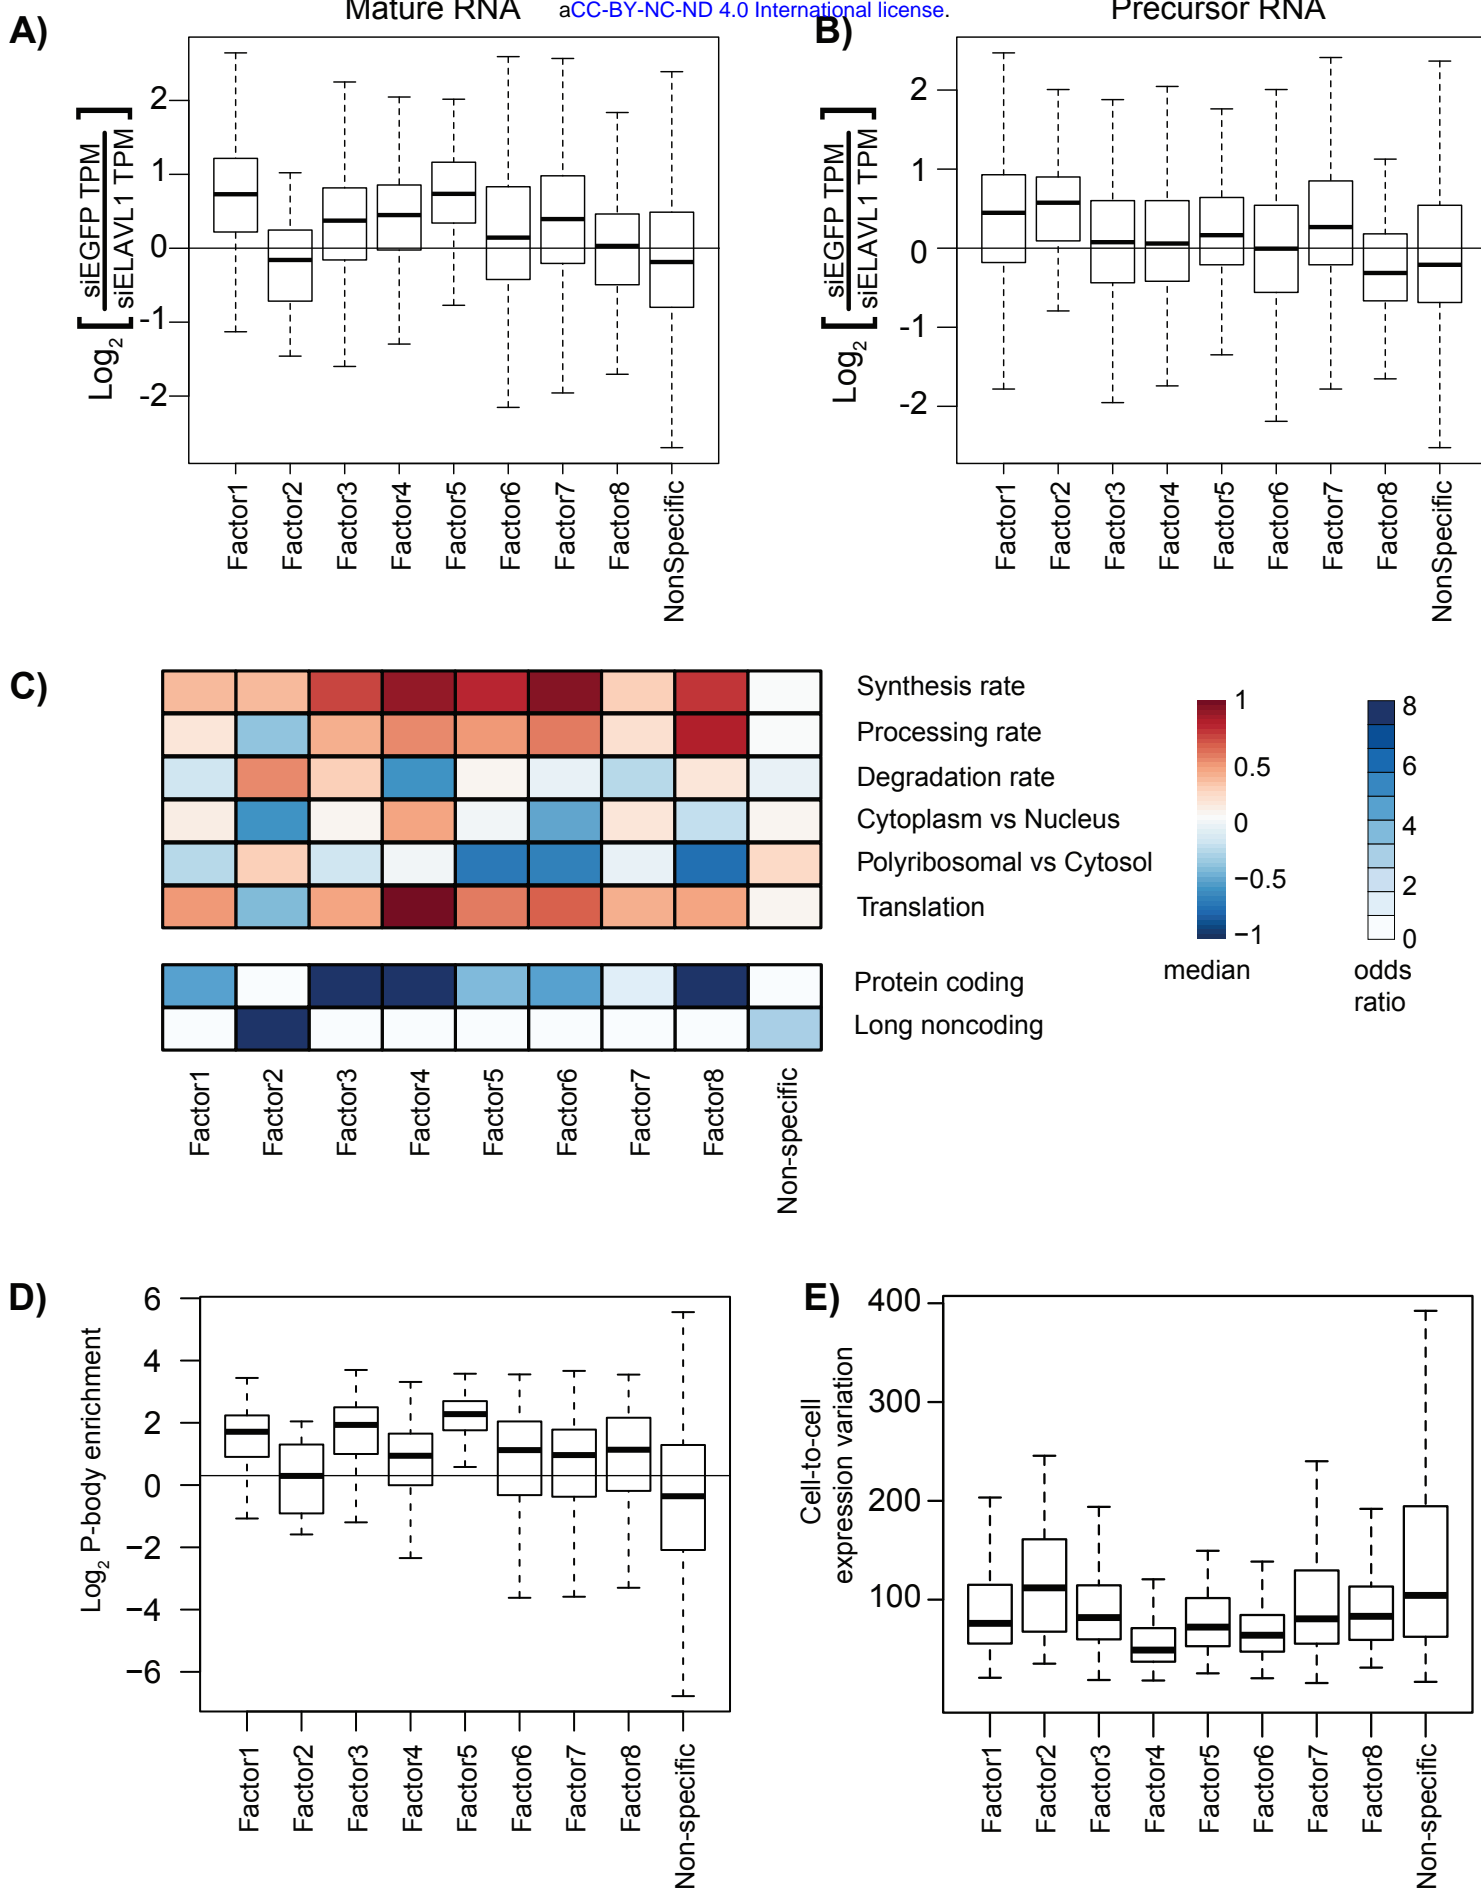

Source: https://www.biorxiv.org/content/10.1101/295097v1.full.pdf
